# Supplementary material for: Axonemal dynein light chain-1 locates at the microtubule-binding domain of the γ heavy chain
Source: PubMed Central journal article supplement — Mol Biol Cell. 2015 Nov 15;26(23):4236–47. doi: 10.1091/mbc.E15-05-0289 (PMC4642857; doi:10.1091/mbc.e15-05-0289), 2015-11-15
Supplement: supp_E15-05-0289v1_IchikawaSupplAll20151029.pdf [file supp_E15-05-0289v1_IchikawaSupplAll20151029.pdf]

**A**

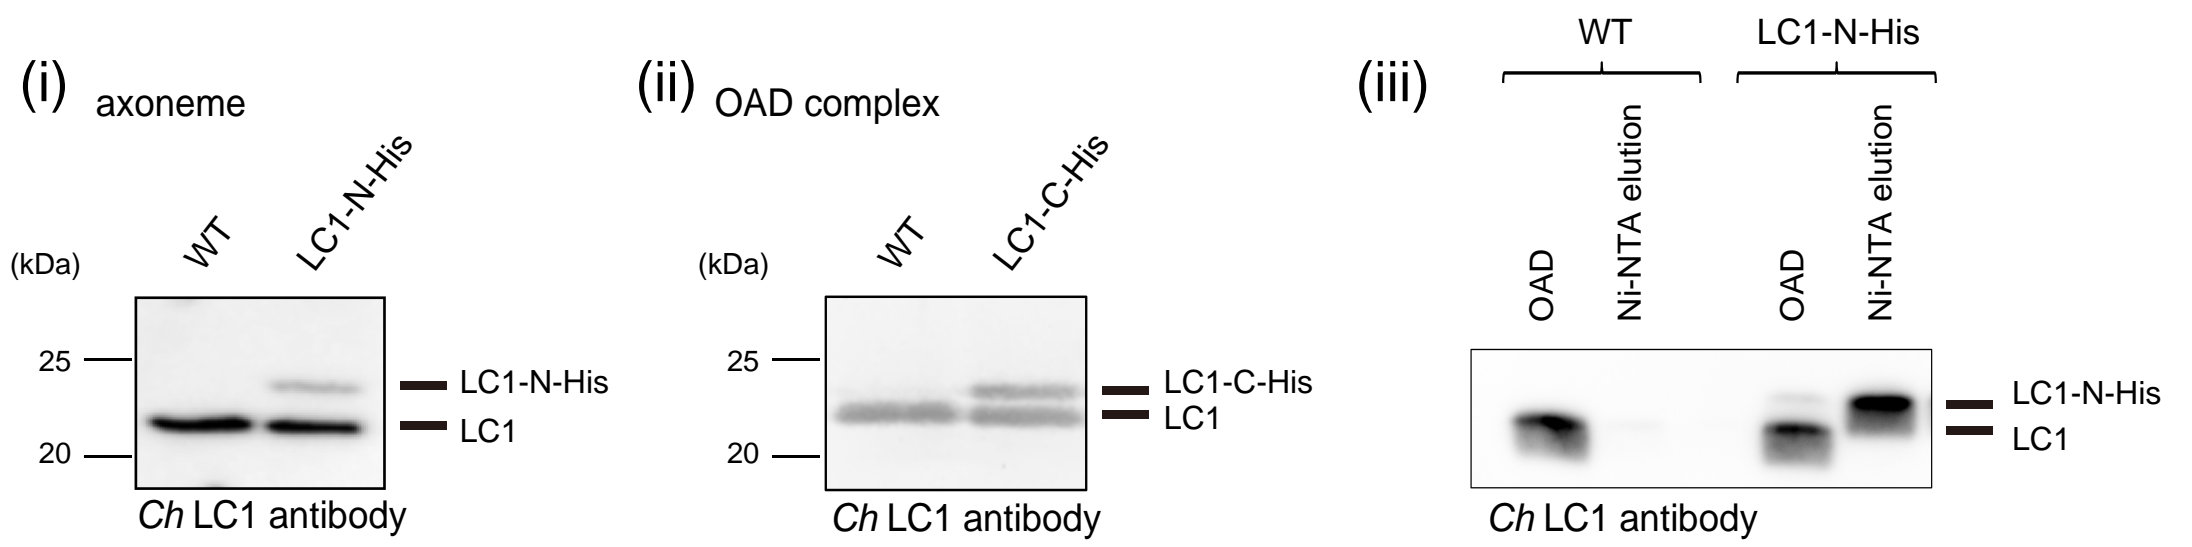

**B**

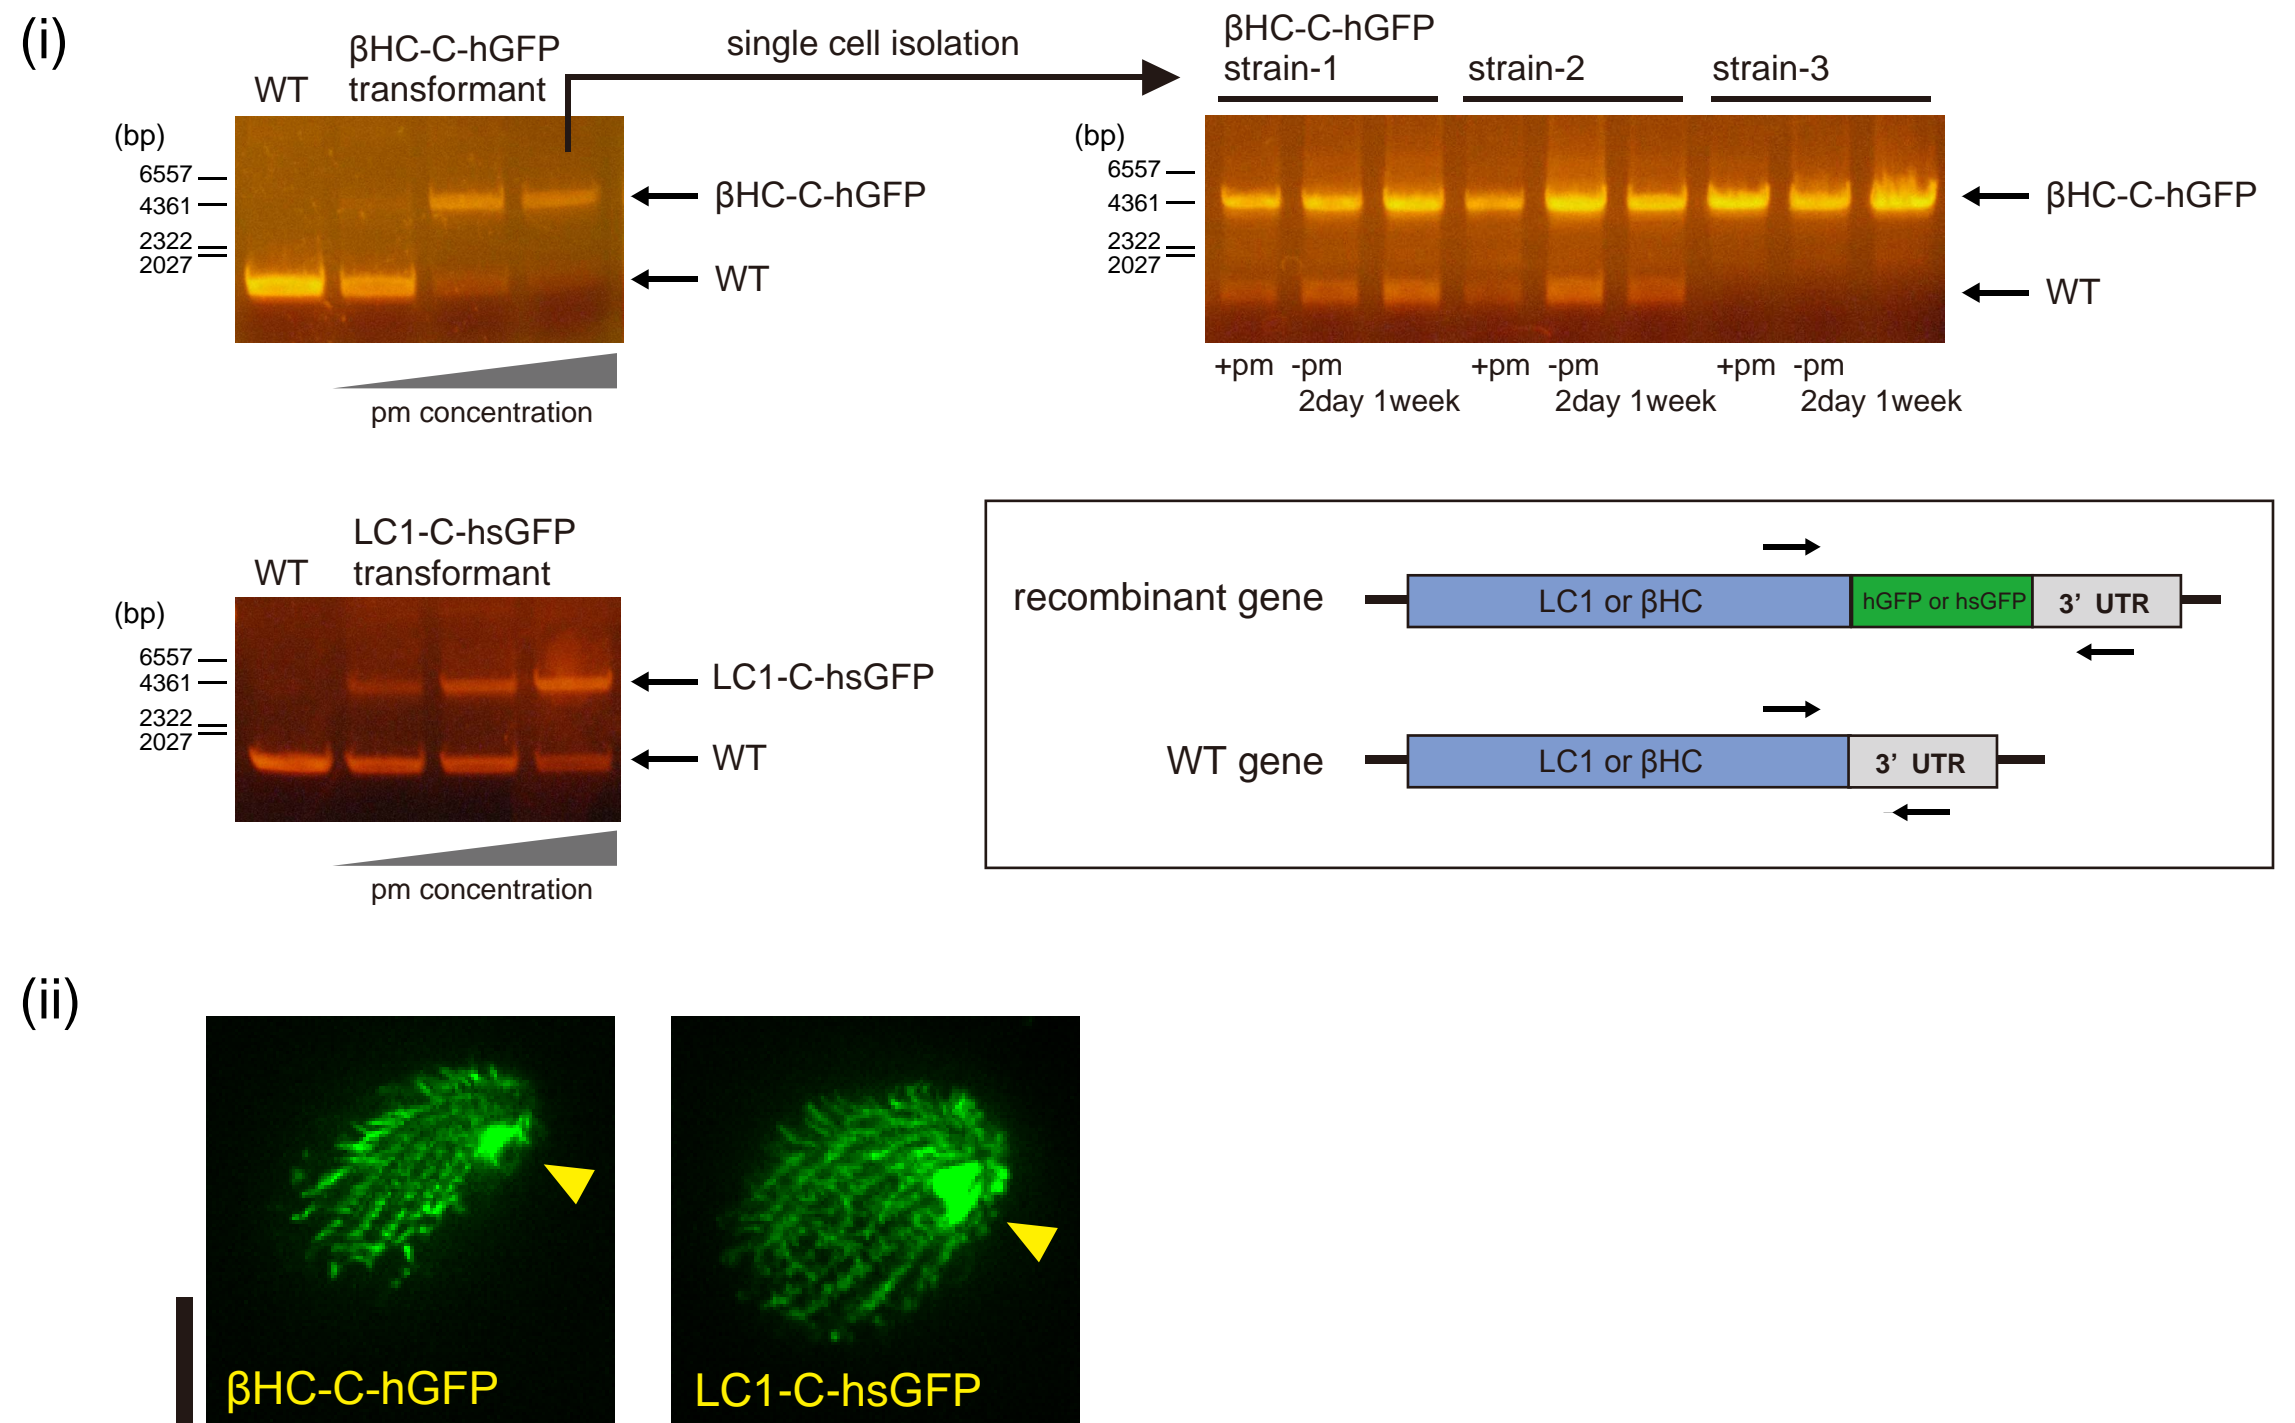

(ii)

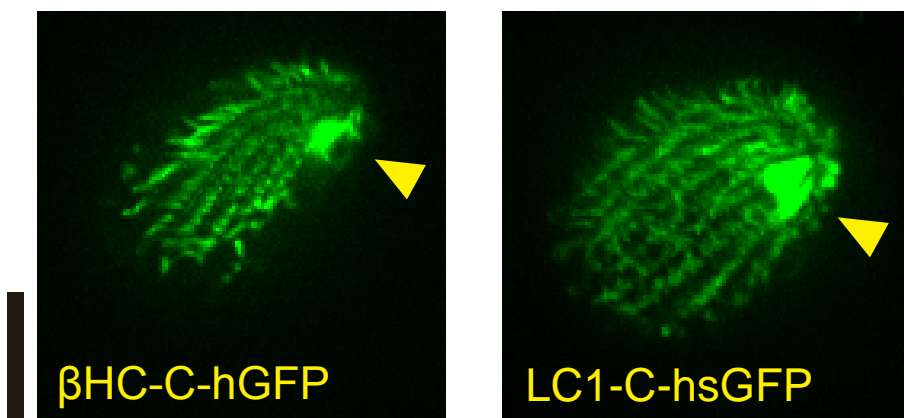

**C**

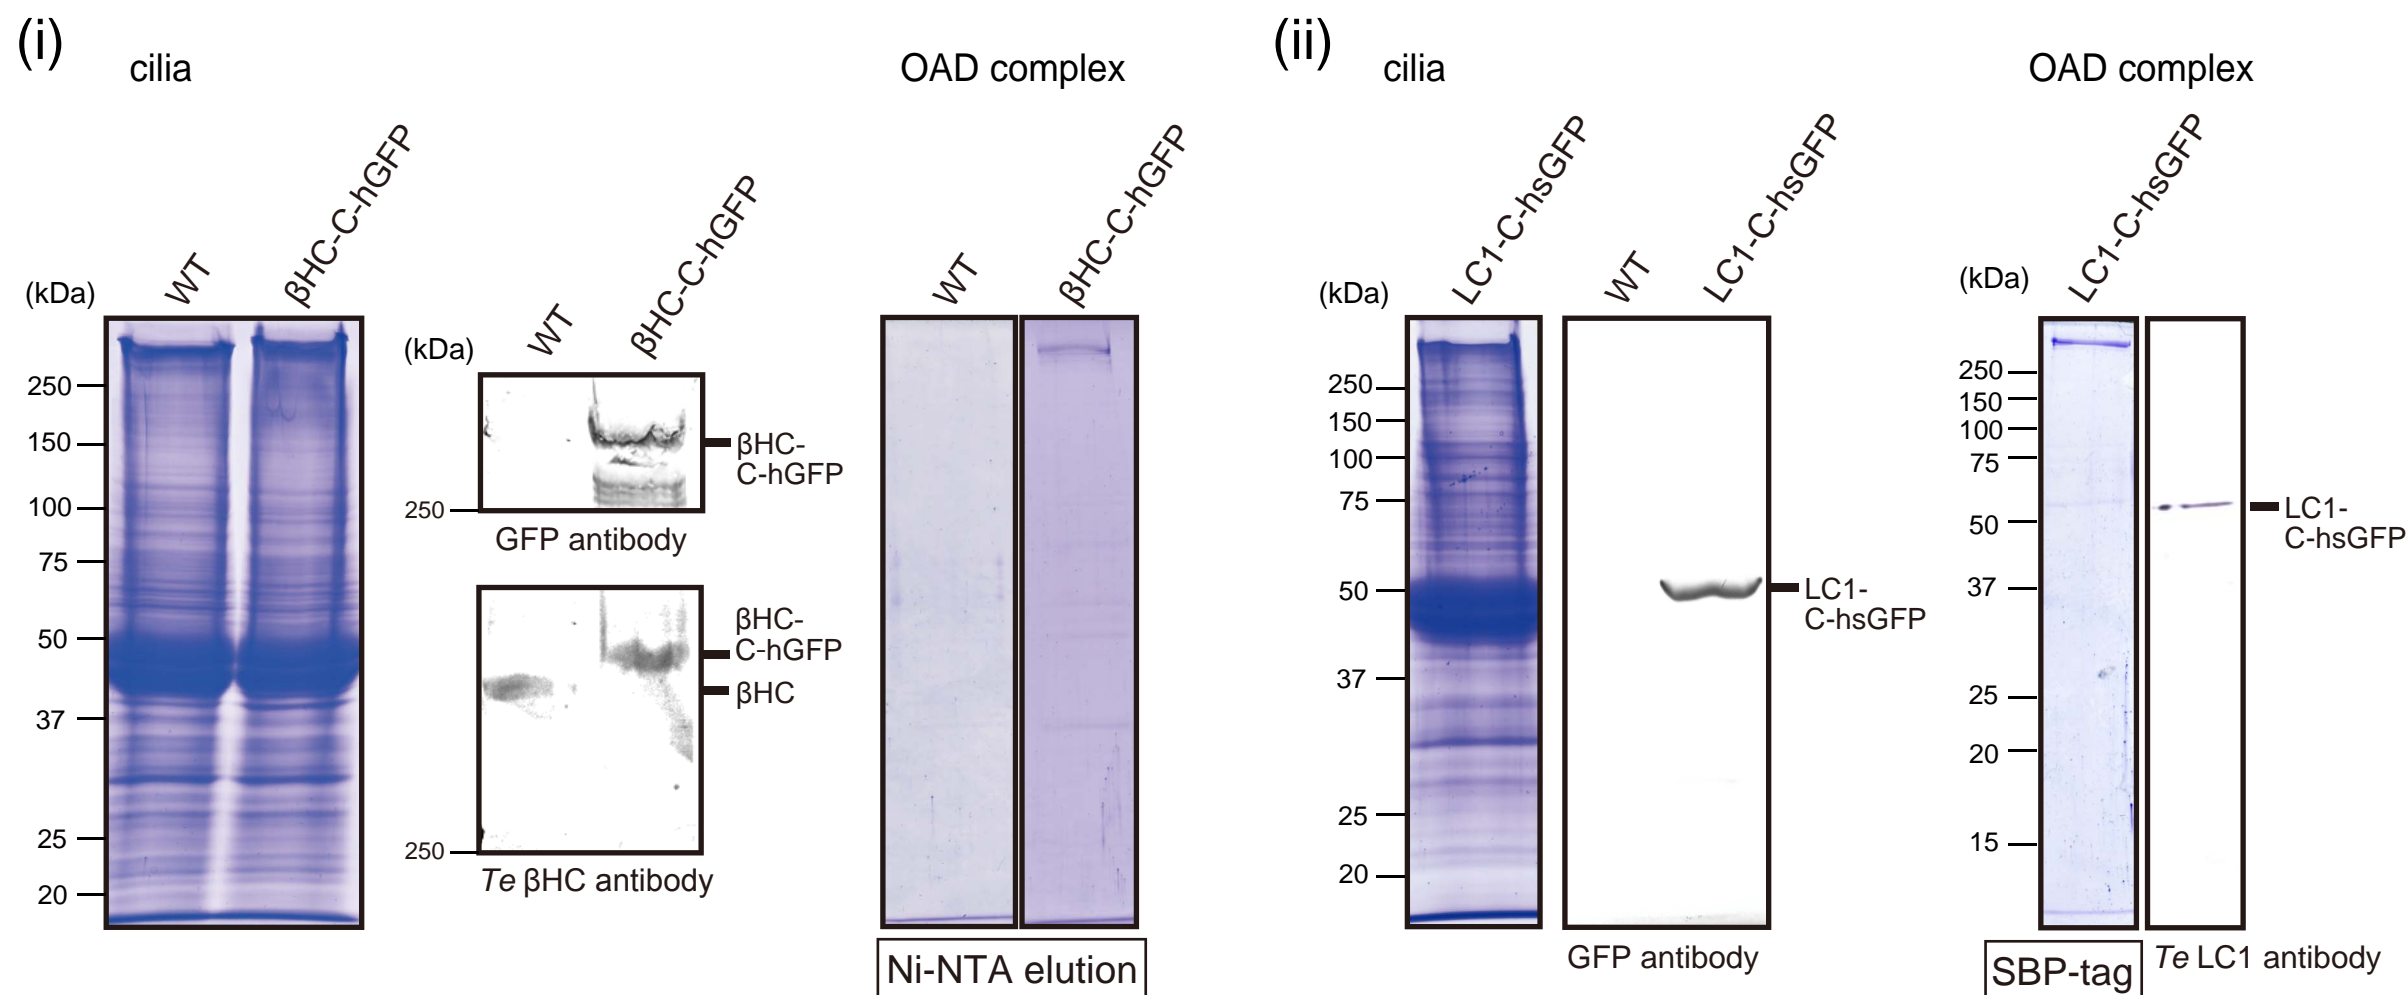

Fig S1

**A**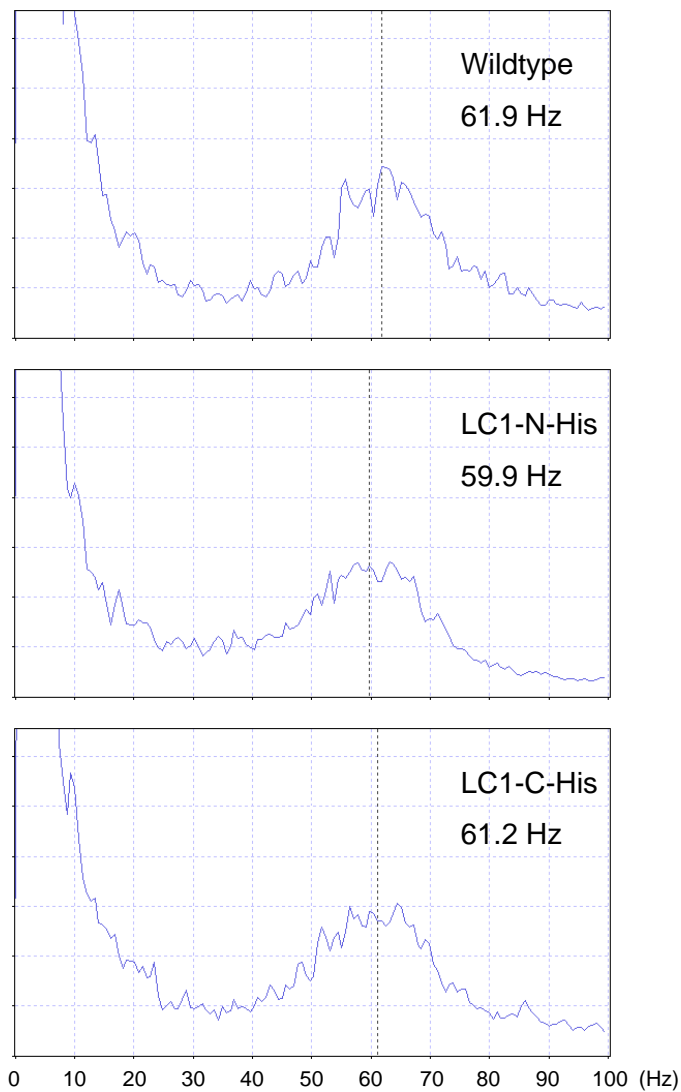**B**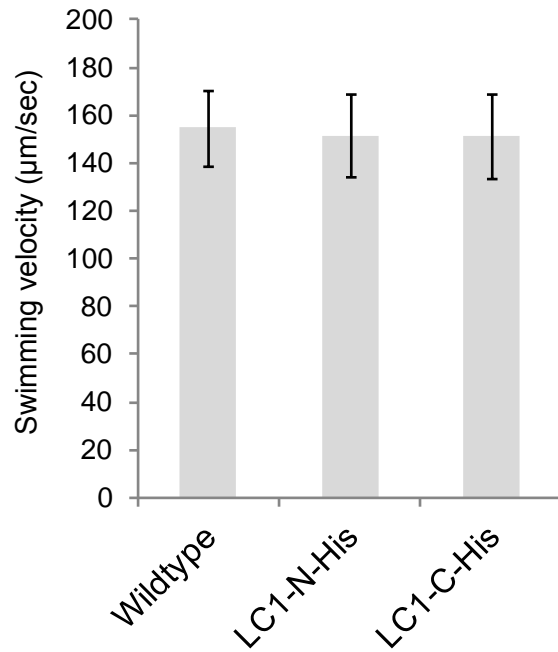**Fig S2**



A

LC1-C-hsGFP

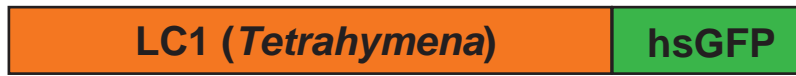

1

202

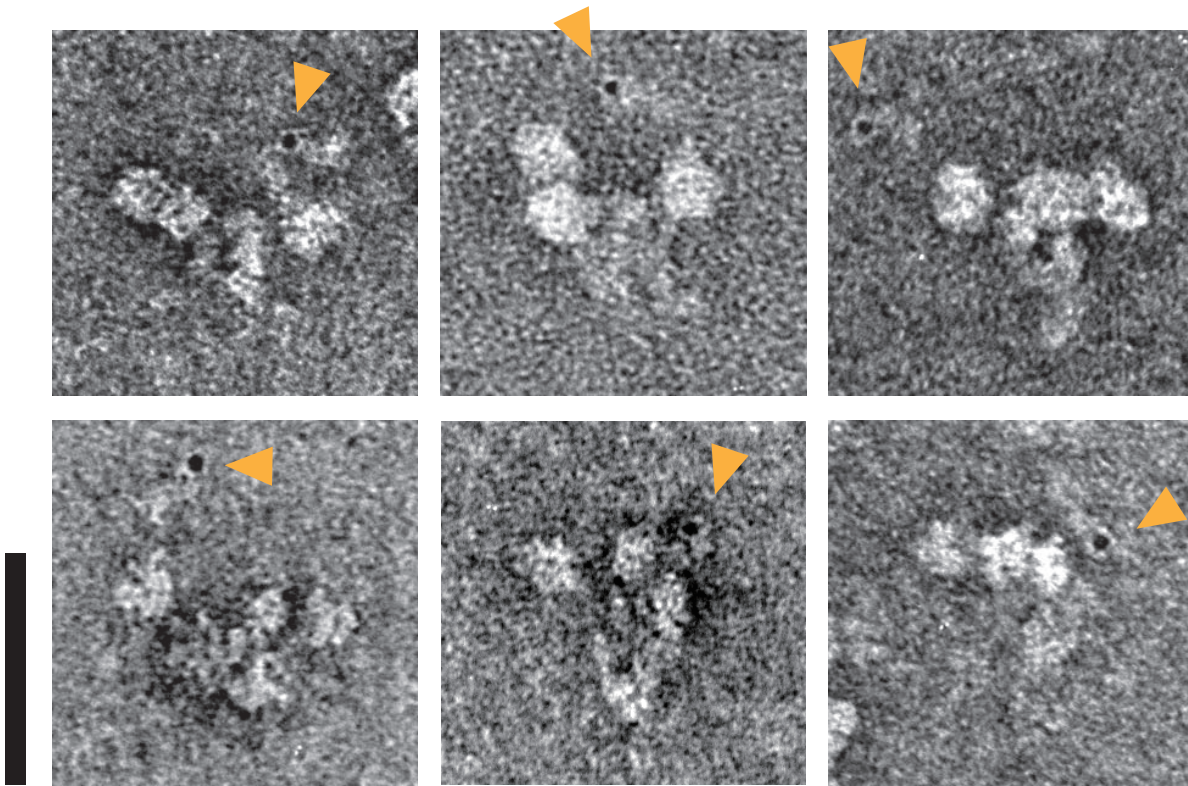

B

$\beta$ HC-C-hGFP

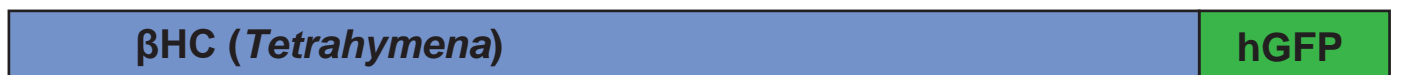

1

4595

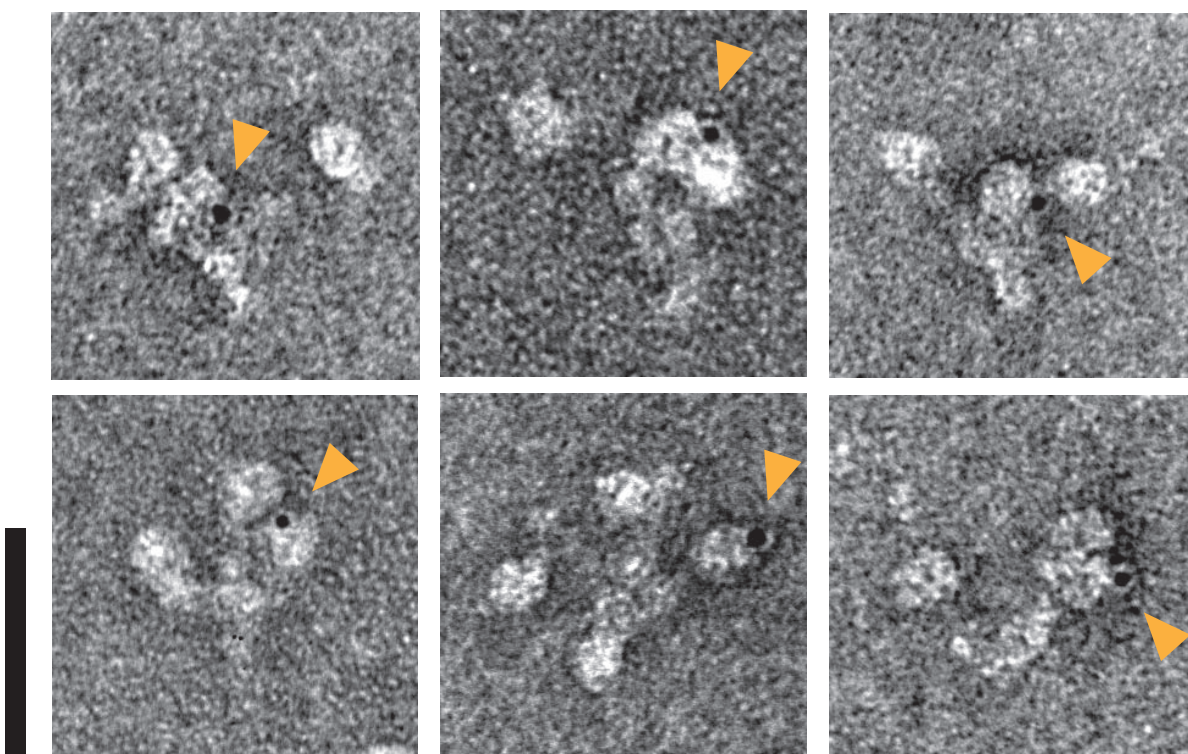

Fig S3



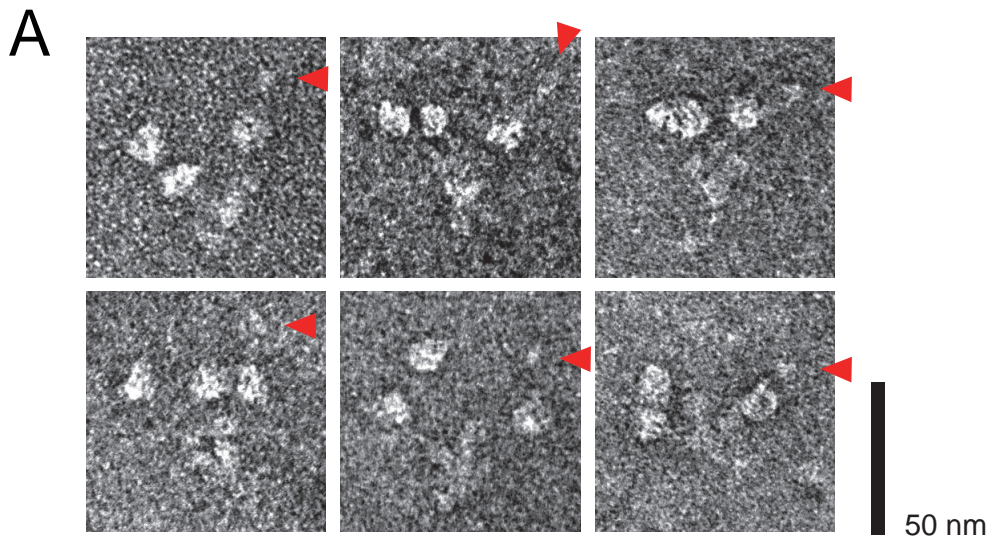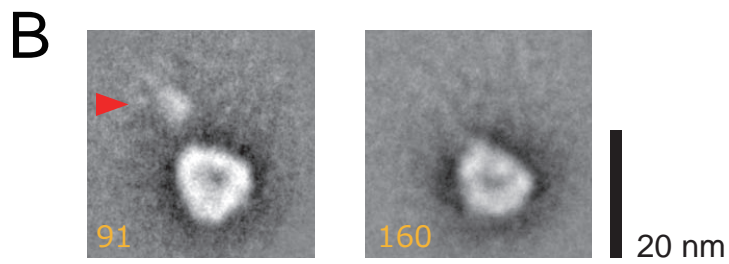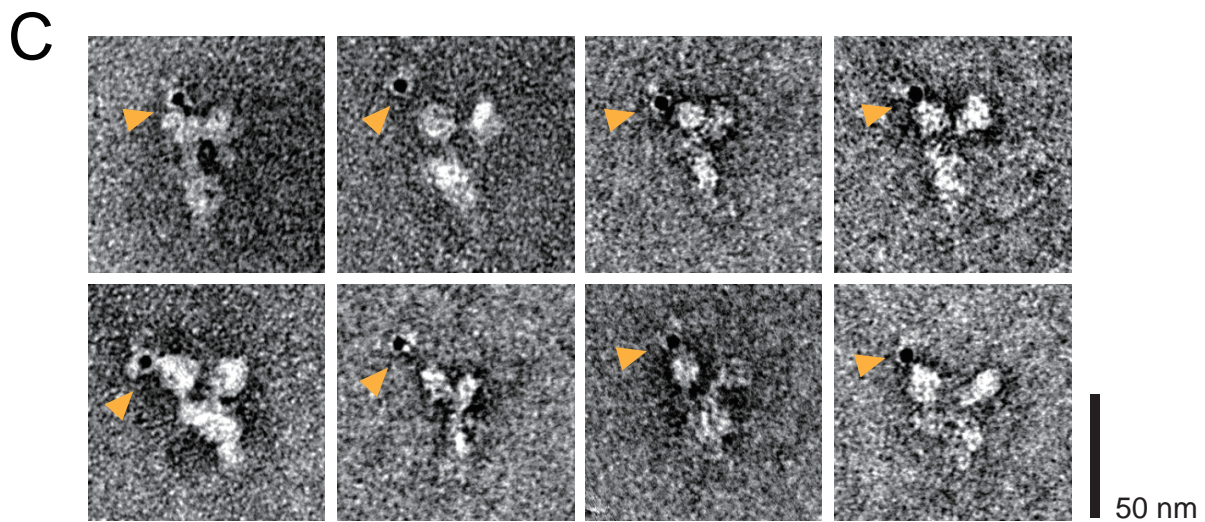

Fig S4

**A**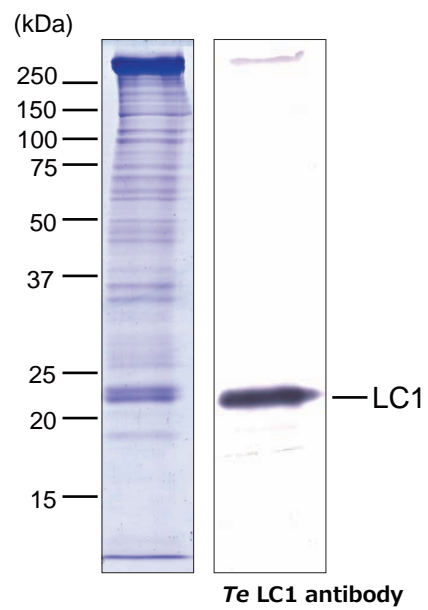**B**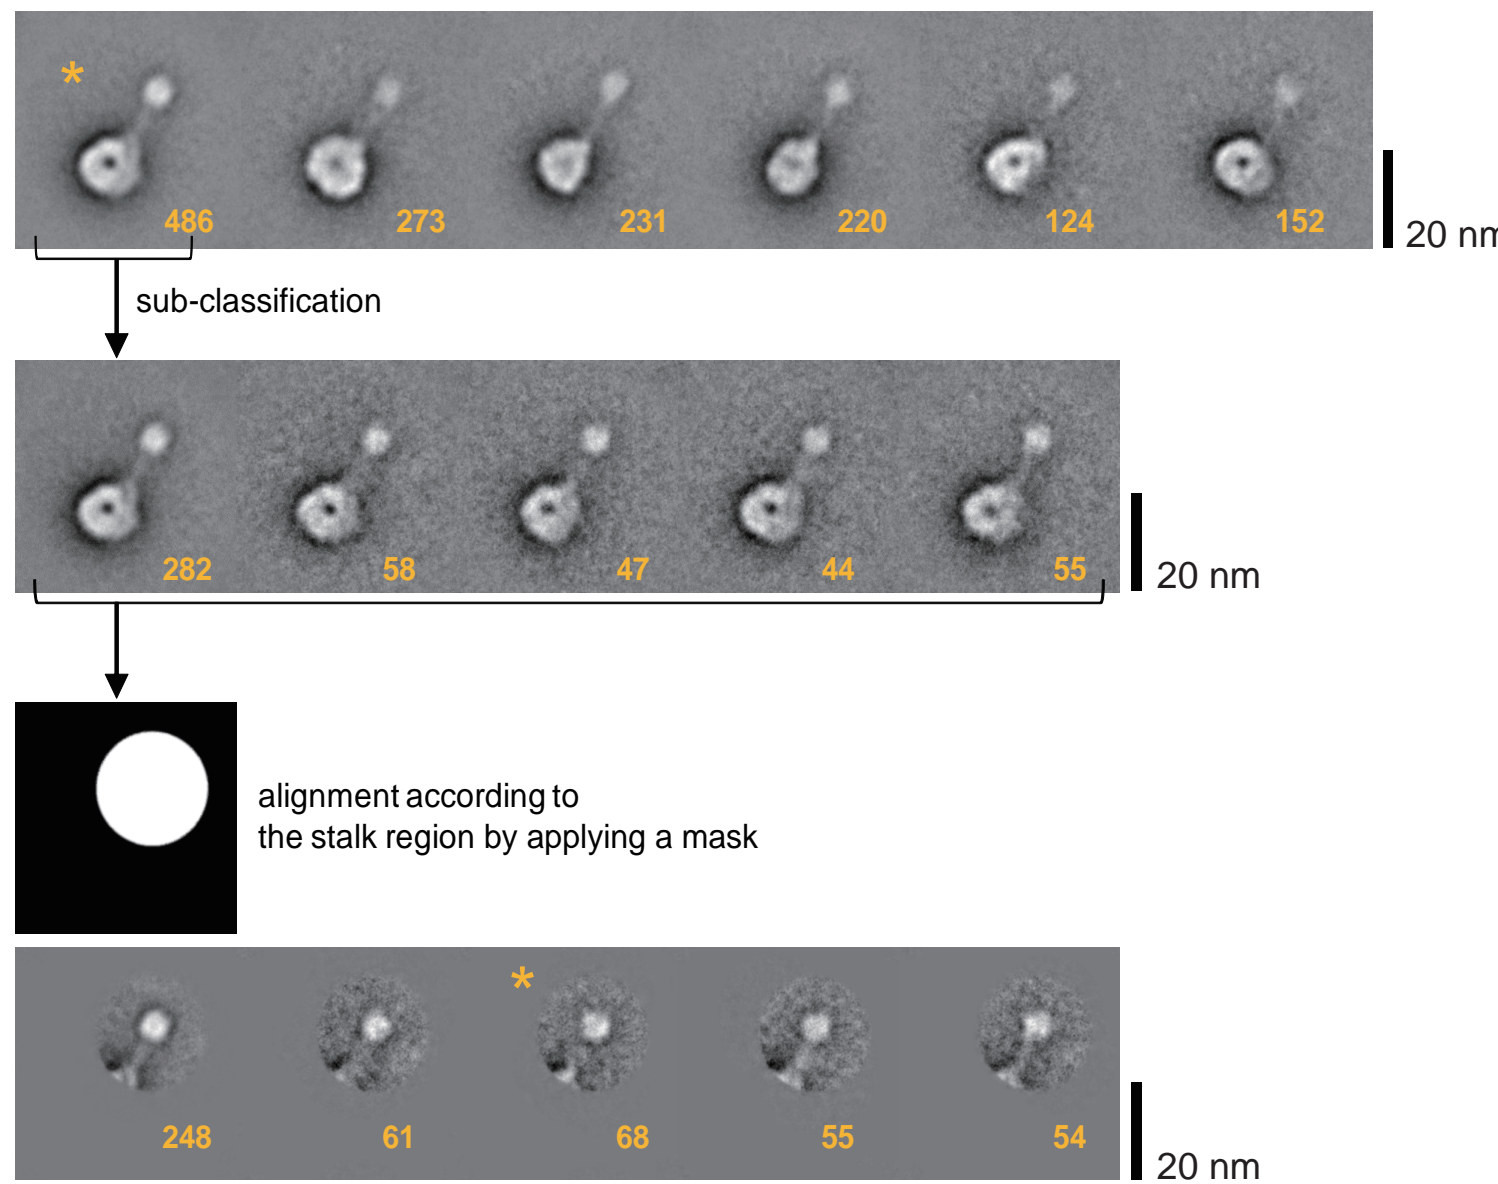**C**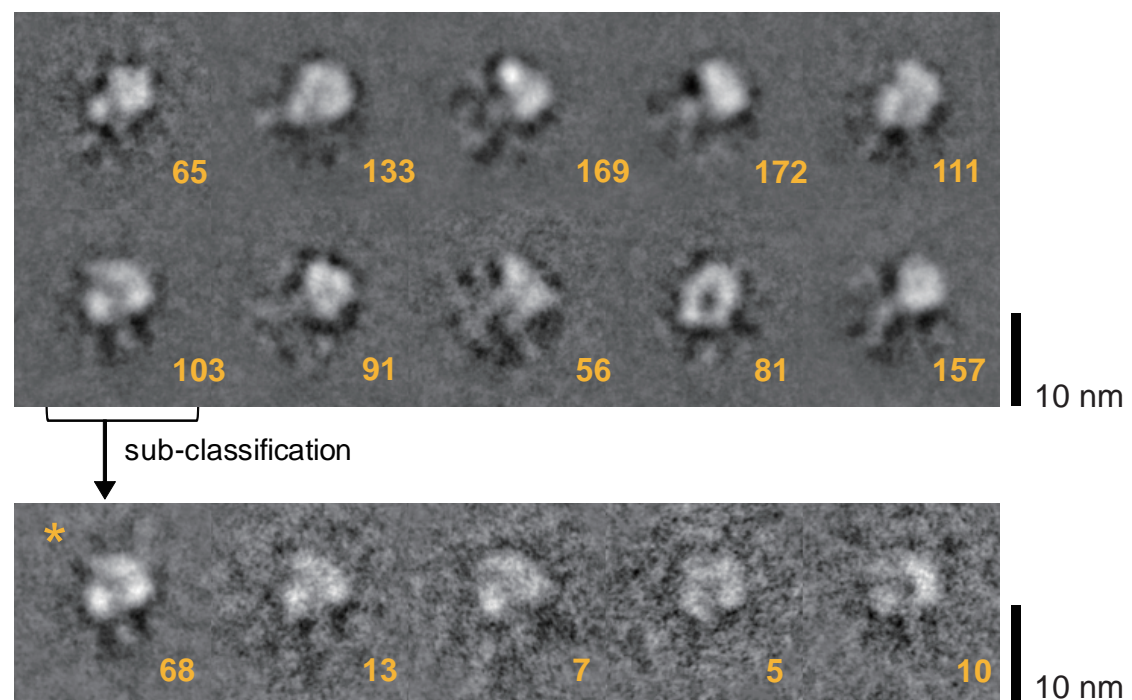

Fig S5



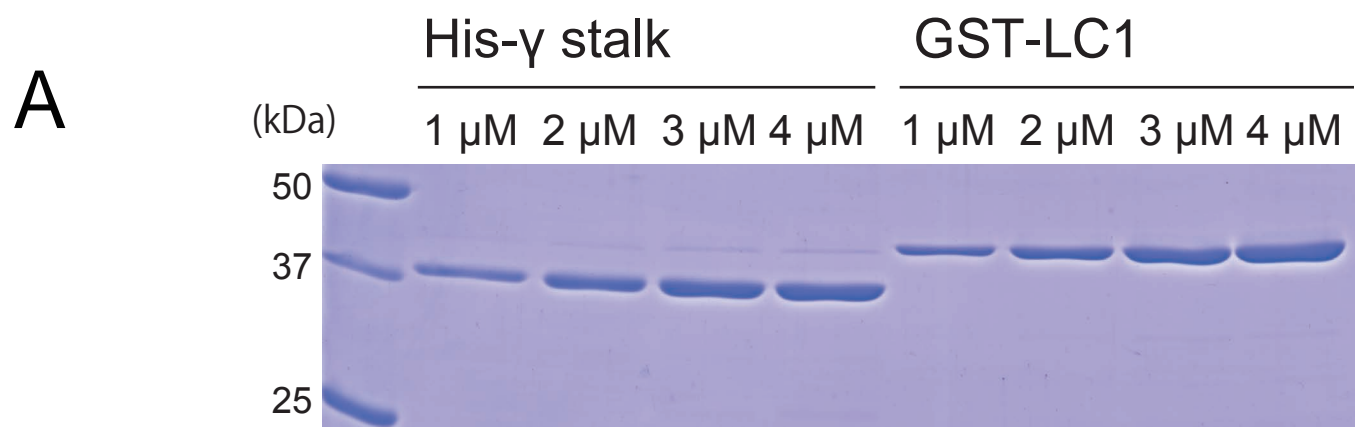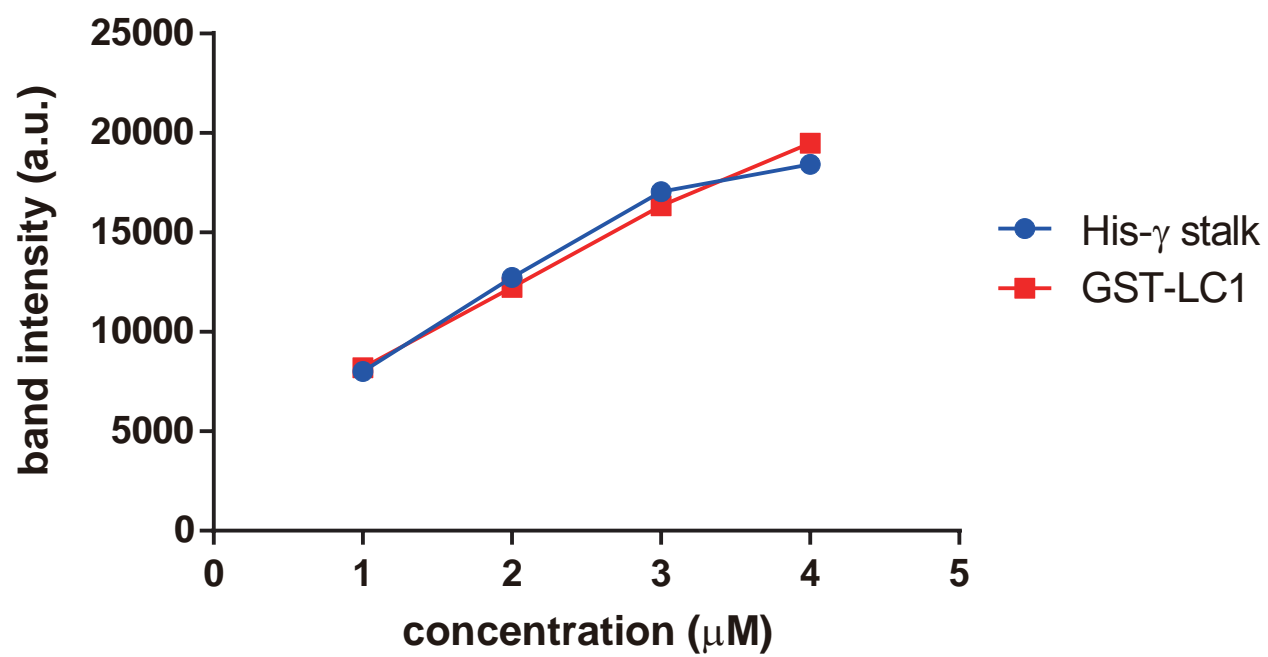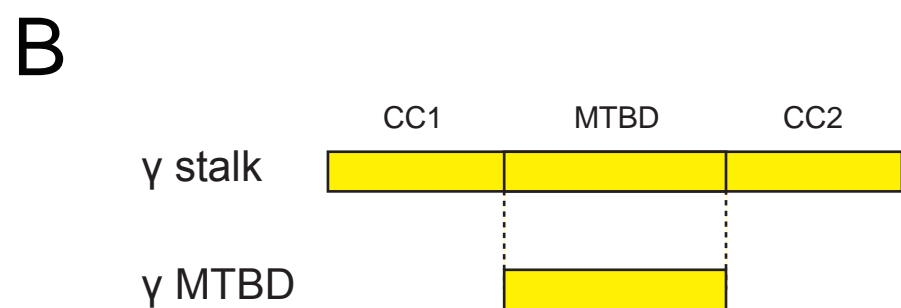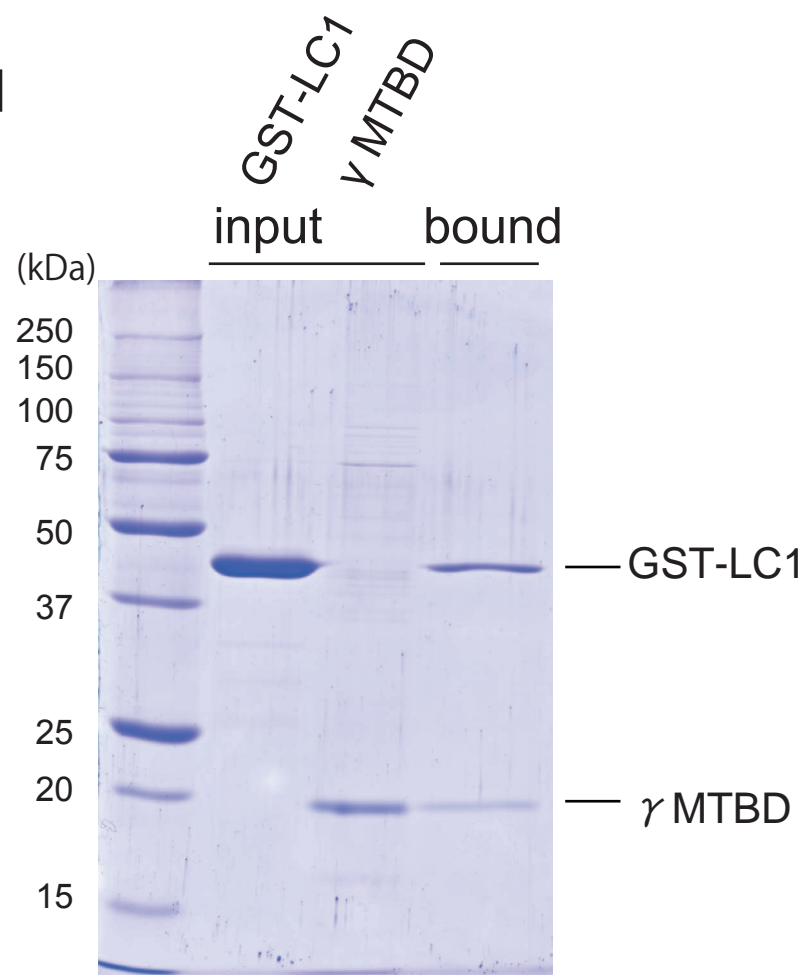

Fig S6

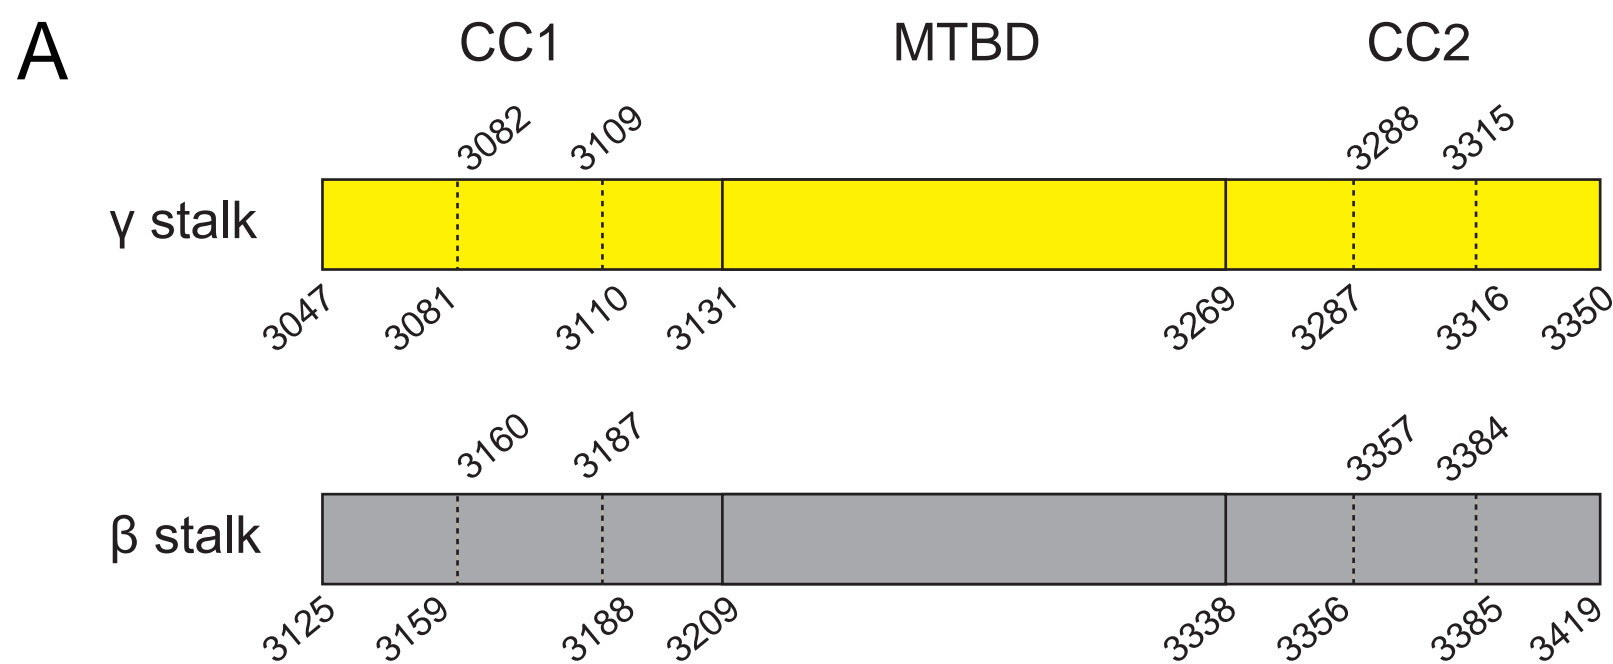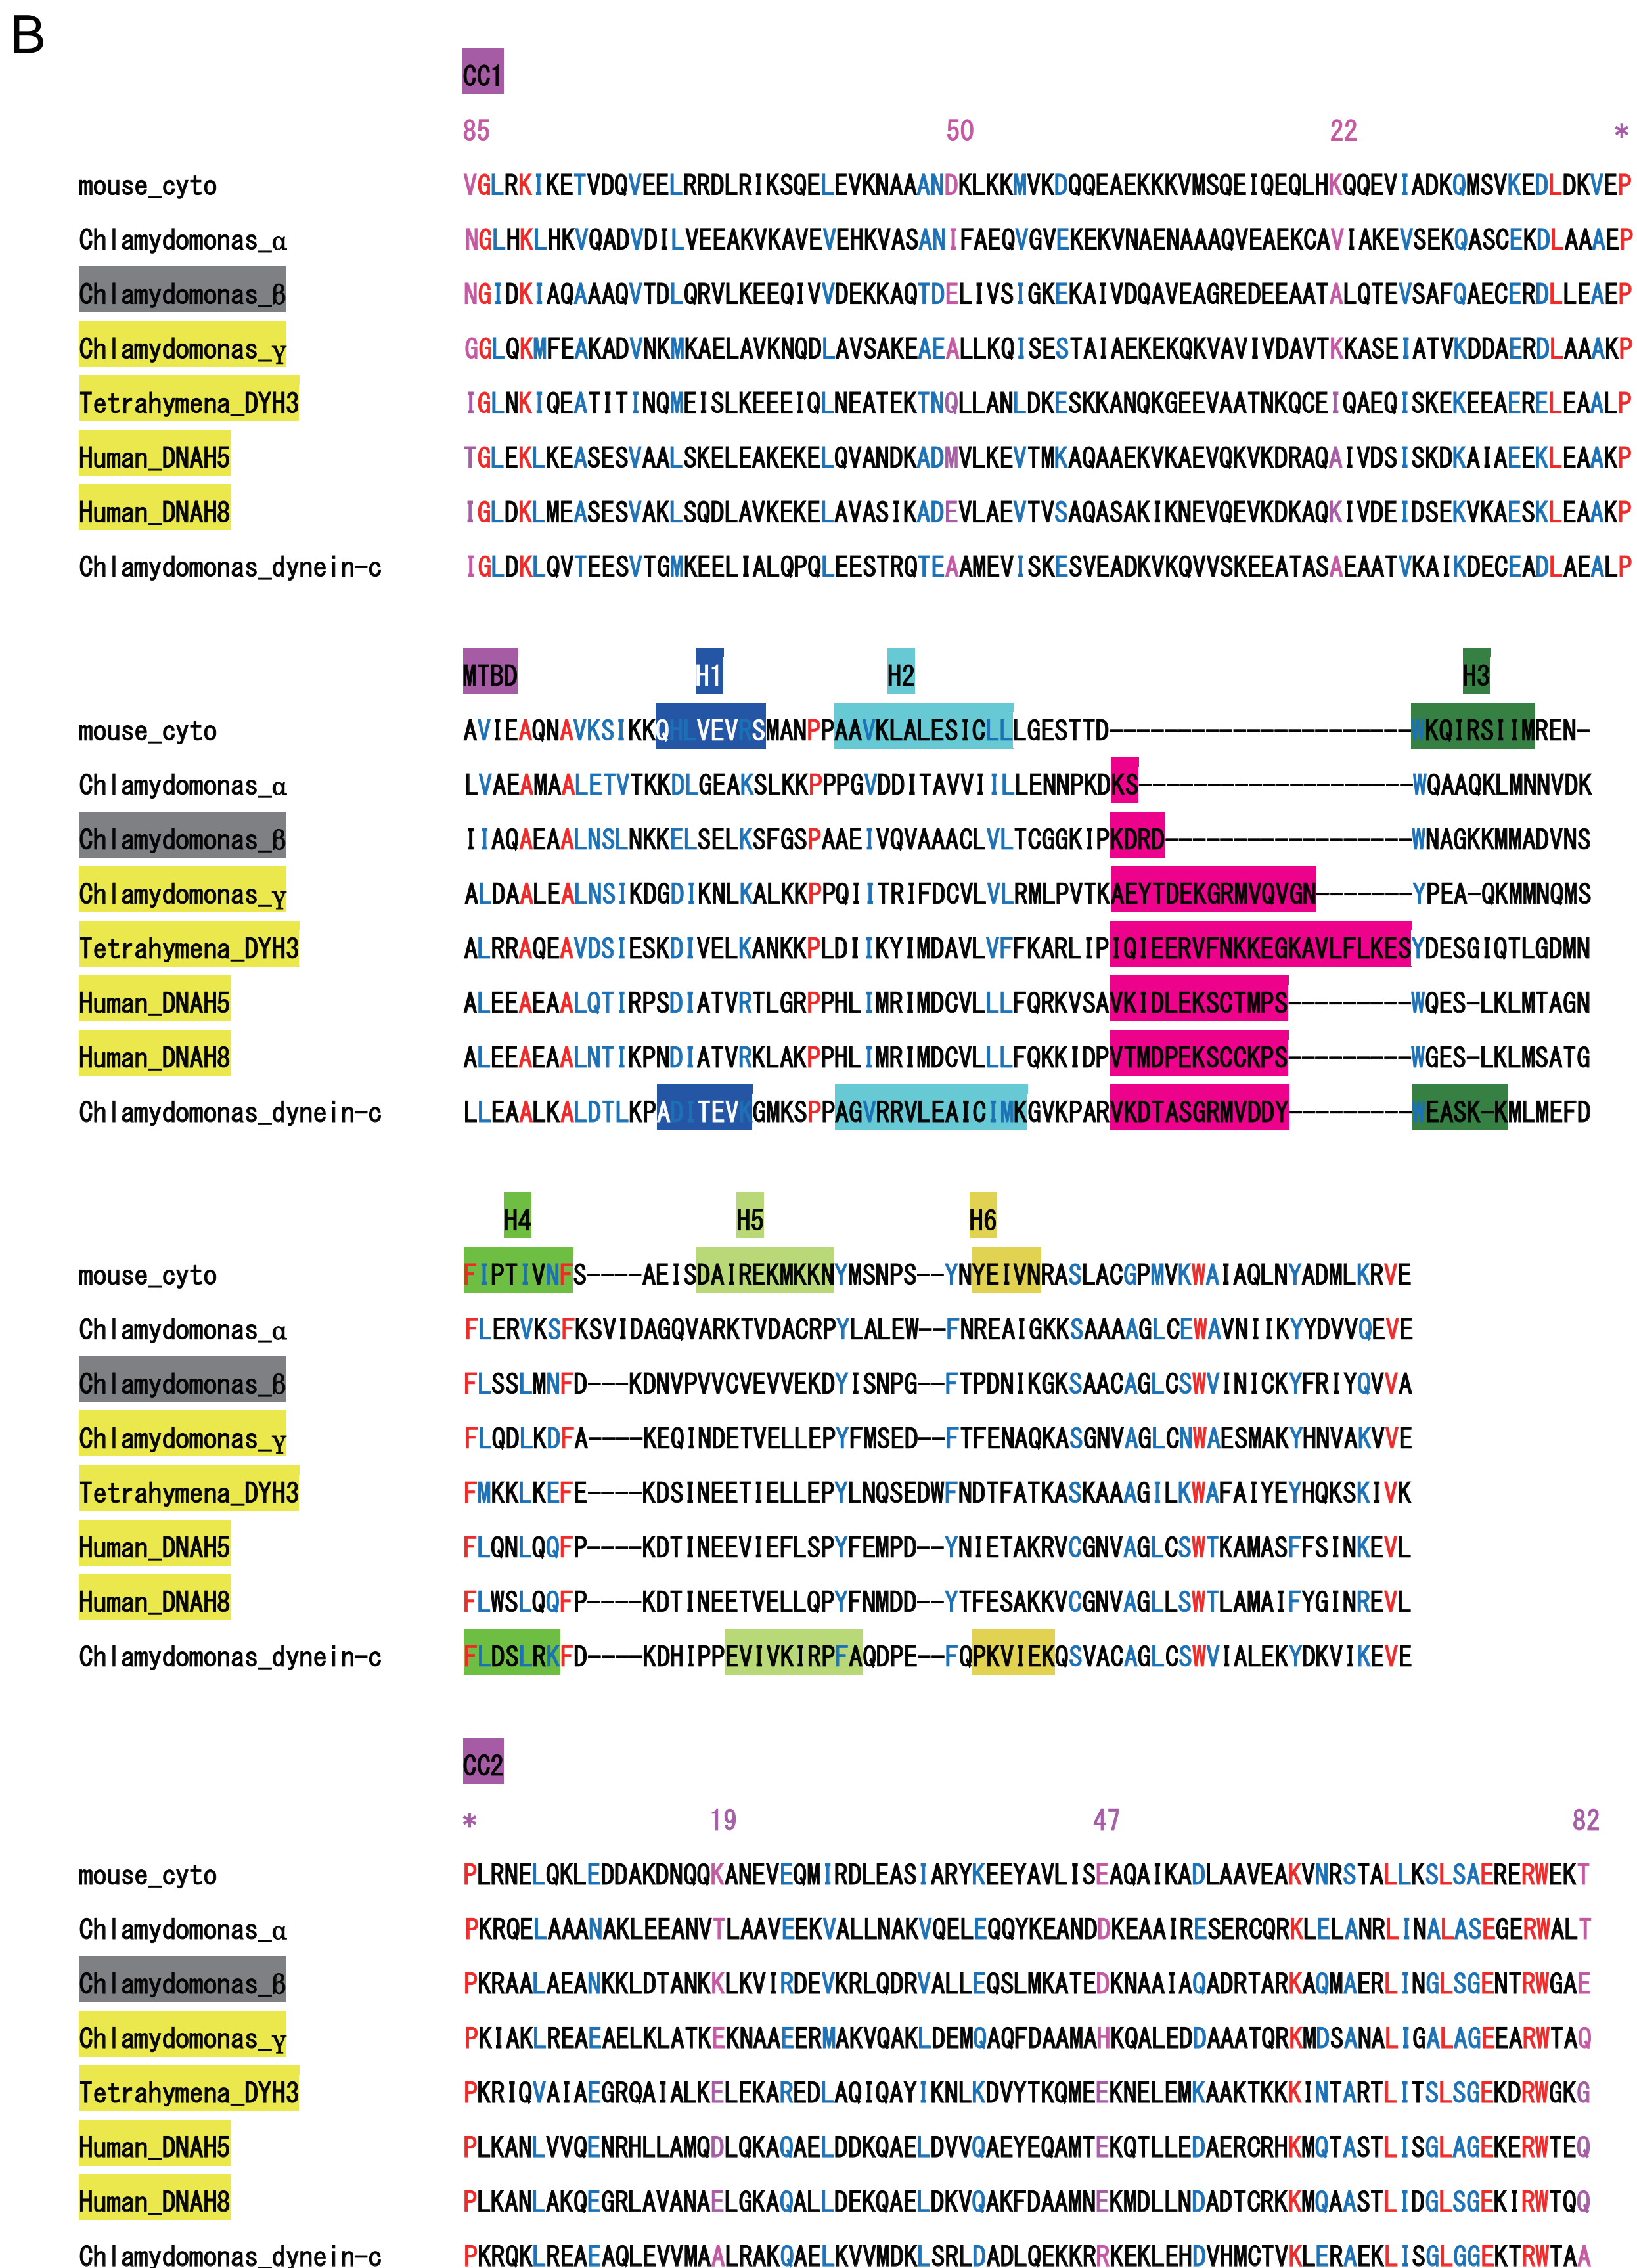

Fig S7

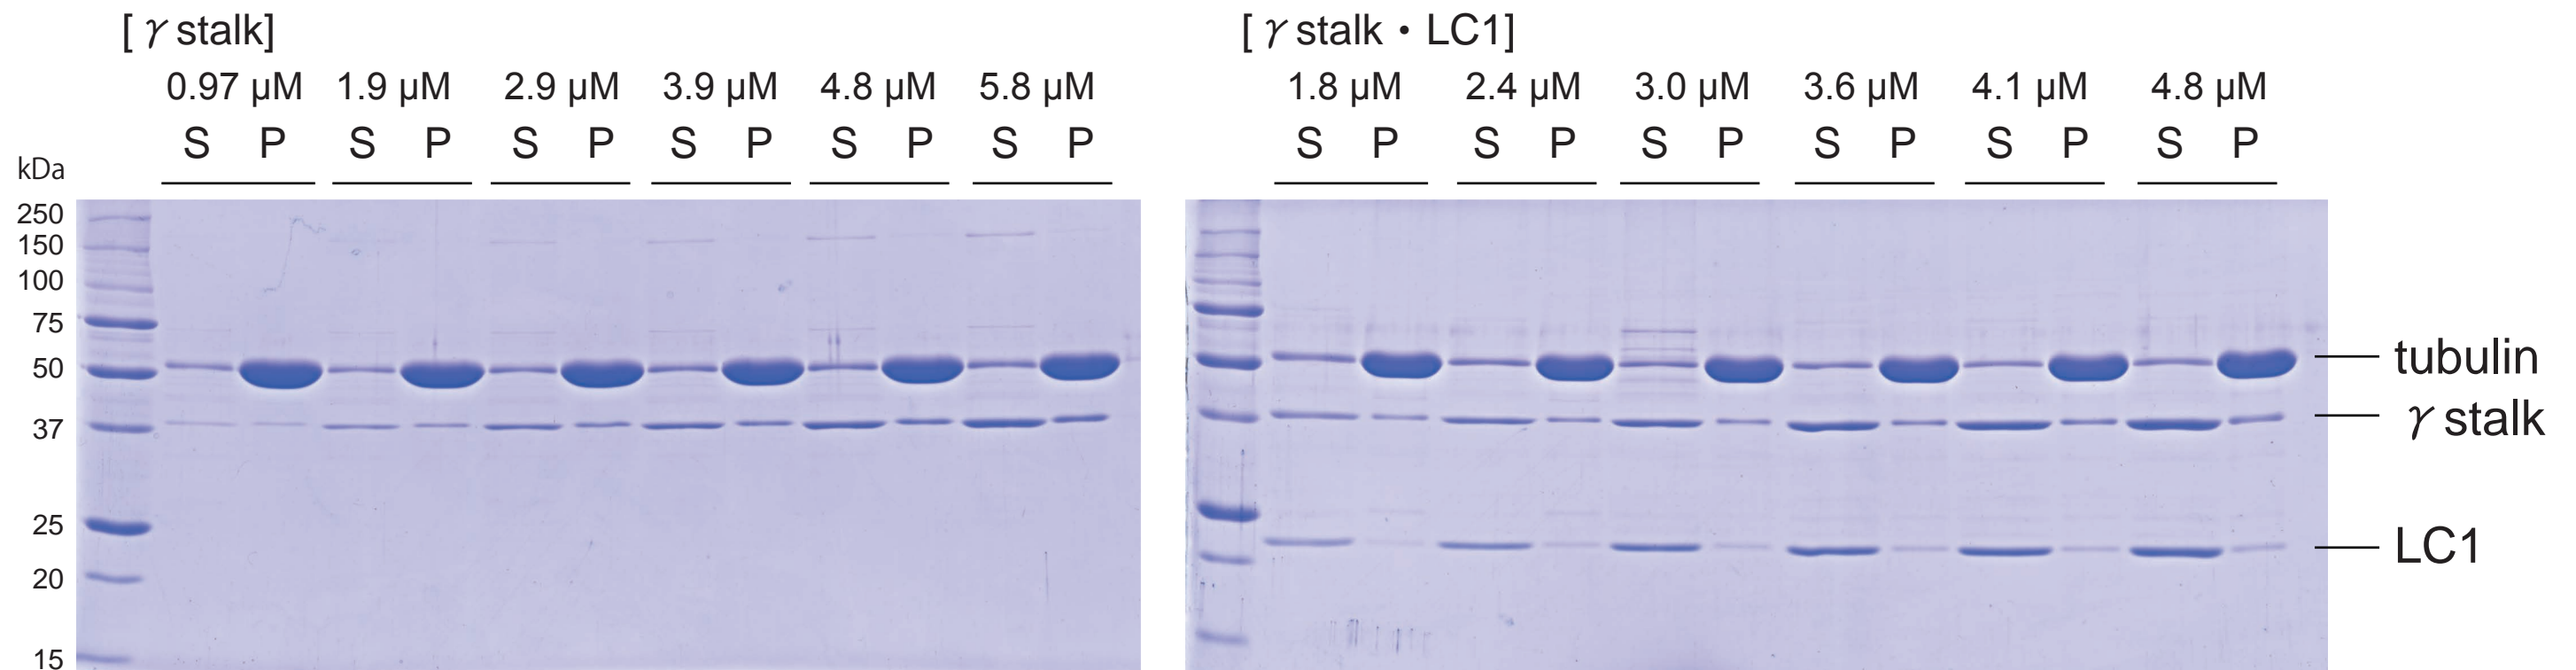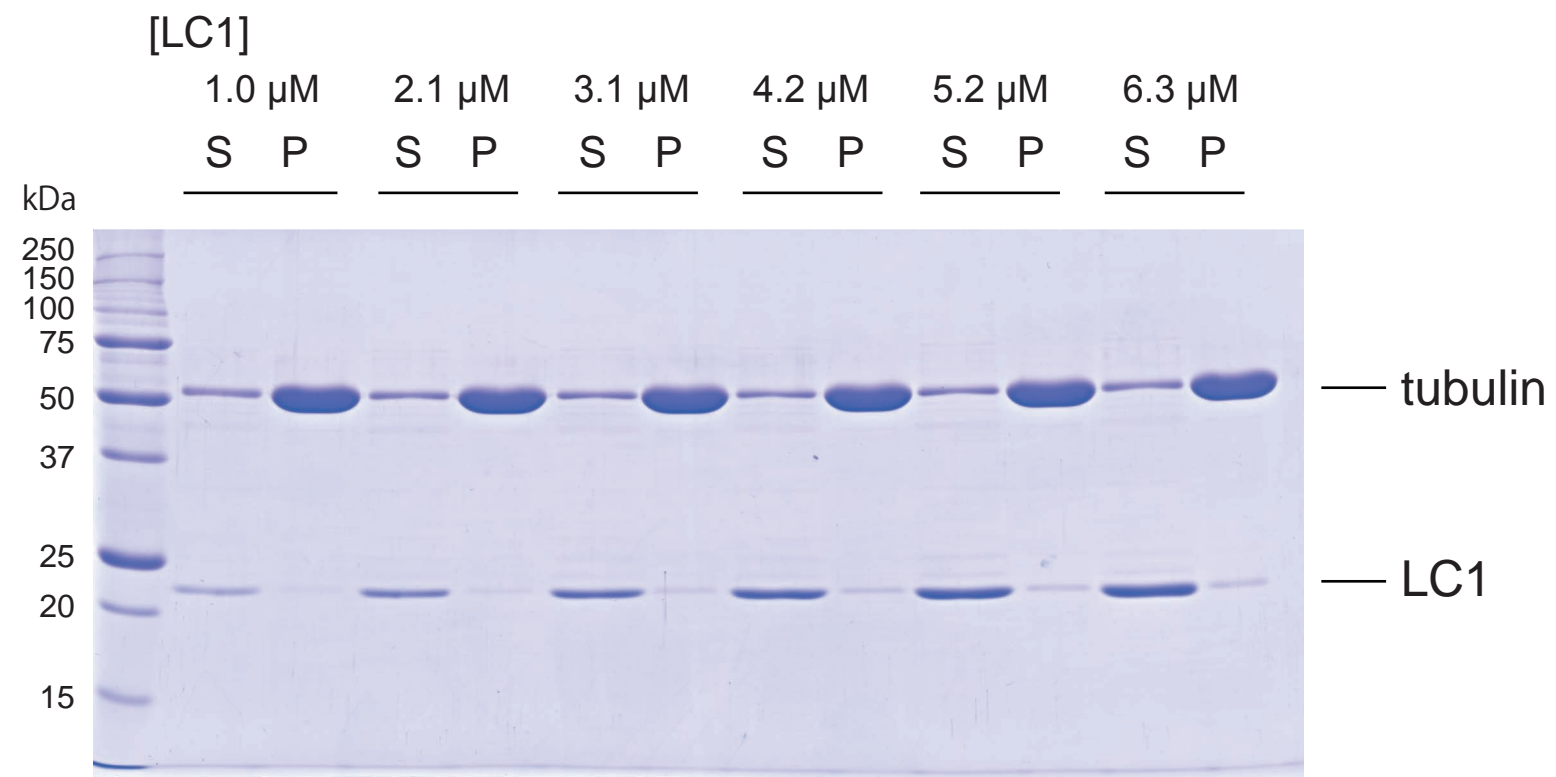

S: supernatant  
P: precipitate

Fig S8



A

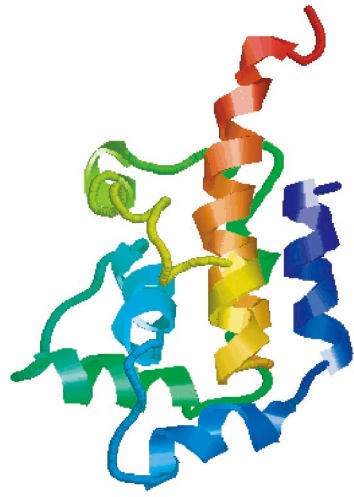

180°  
—  
↻  
—

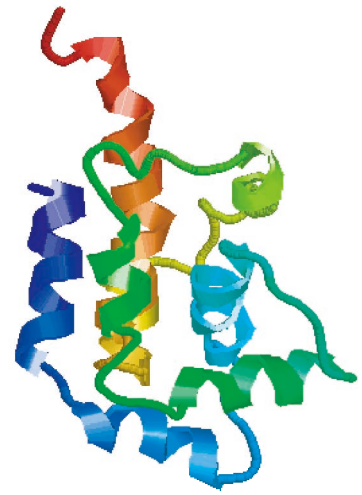

B

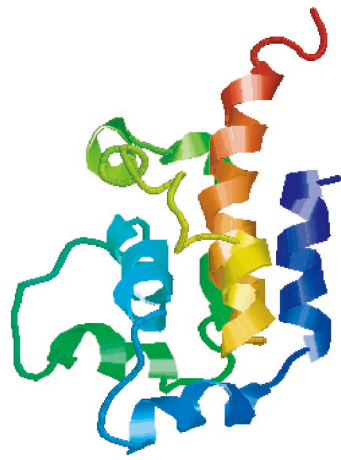

180°  
—  
↻  
—

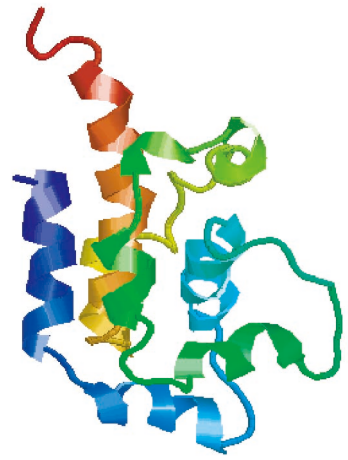

C

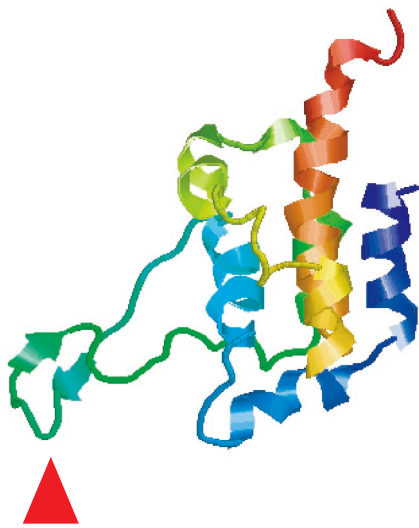

180°  
—  
↻  
—

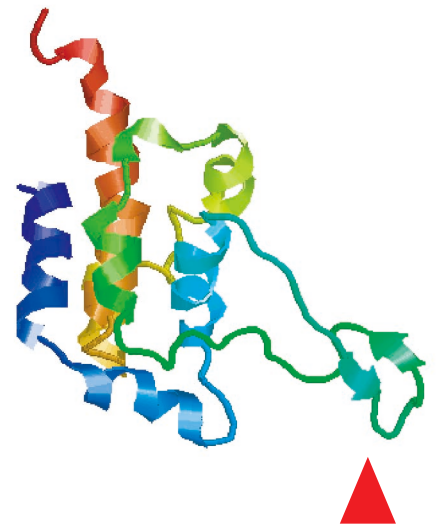

Fig S9





6 **Figure S1. Recombinant *Chlamydomonas* and *Tetrahymena*, and recombinant OAD complex.**

7 (A) Assessment of His-tagged *Chlamydomonas* LC1.

8 (i) Western blots of axonemes of WT and LC1-N-His recombinant strains by *Chlamydomonas* LC1 antibody (*Ch*  
9 LC1 antibody).

10 (ii) Western blots of the OAD complexes of WT and LC1-C-His by *Chlamydomonas* LC1 antibody (*Ch* LC1  
11 antibody). The OAD complex in (ii) was prepared by the ATP extraction. Both His-tagged and wild-type LC1 were  
12 detected in (i) and (ii).

13 (iii) The OAD complex was extracted from recombinant *Chlamydomonas* axonemes under high salt conditions and  
14 further affinity purified using a Ni-NTA affinity.

15 (B) Assessment of *Tetrahymena* transformants.

16 (i) PCR was performed using genomic DNA purified from the WT strain or transformants (strains  $\beta$ HC-C-hGFP and  
17 LC1-C-hsGFP) using primer sets  $\beta$ HC-C-F/ $\beta$ HC-genome-check-R or LC1-C-F/LC1-genome-check-R. The positions  
18 of the primer annealing sites are shown in the schematic diagram. By phenotypic assortment process, the wild type  
19 genes were replaced by recombinant genes. For the  $\beta$ HC-C-hGFP strain, single cell lines were obtained (strains-1, 2,  
20 and 3). All ~45 copies of genes in strain-3 were thought to be replaced by recombinant genes because no wild-type  
21 genes were detected in cells cultured without paromomycin (unlike for the strains-1 and 2).

22 (ii) Both the recombinant  $\beta$  HC and LC1 were detected in *Tetrahymena* cilia by GFP fluorescence. Arrowheads  
23 indicate the oral apparatus. Bar, 20  $\mu$ m.

24 (C) Assessment of the recombinant *Tetrahymena* OAD constructs.

25 (i)  $\beta$ HC-C-hGFP was detected in cilia by Western blots using anti *Tetrahymena*  $\beta$  HC antibody (*Te*  $\beta$ HC antibody)  
26 and anti GFP antibody. The  $\beta$ HC-C-hGFP protein was purified using Ni-NTA resin.

27 (ii) LC1-C-hsGFP was detected in cilia and in the OAD complex by Western blots using anti GFP antibody and anti  
28 *Tetrahymena* LC1 antibody (*Te* LC1 antibody). The LC1-C-hsGFP OAD complex was extracted in high salt condition  
29 and further purified by SBP-tag on the LC1.

30

31 **Figure S2. Characterization of motility of recombinant *Chlamydomonas*.**

32 The beat frequencies (A) and swimming velocities (B) of wild type and the recombinant *Chlamydomonas*. The mean  
33 values for swimming velocities are as follows: Wild type,  $154.8 \pm 15.8 \mu\text{m}/\text{sec}$ ; LC1-N-His,  $151.4 \pm 17.4 \mu\text{m}/\text{sec}$ ;  
34 LC1-C-His,  $151.5 \pm 17.8 \mu\text{m}/\text{sec}$  (mean  $\pm$  SD, n = 20 each).

35

36 **Figure S3. EM images of *Tetrahymena* OAD complex.**

37 (A) Schematic diagram of the LC1-C-hsGFP construct and EM images of the Ni-NTA-nanogold labeled *Tetrahymena*  
38 LC1-C-hsGFP OAD complex. Gold particles (orange arrowheads) bound at one of the stalk tips. Note that the  
39 distribution of the gold particles was wider than in the labeling of the *Chlamydomonas* LC1 (Figure 1A), possibly  
40 because of the flexibility of the hsGFP-tag.

41 (B) Ni-NTA-nanogold labeling of the *Tetrahymena*  $\beta$ HC-C-hGFP OAD complex.

42 The gold particles (orange arrowheads) were found at the edge of the AAA+ ring. Scale bars, 50 nm.

43

44 **Figure S4. Supplemental results for the large stalk tip.**  
45 (A) EM images of the native *Tetrahymena* OAD complex.  
46 (B) Class averages of the head domains of *oda11 Chlamydomonas* OAD.  
47 Representative class averages with (left side) or without (right side) extra density (red arrowhead) are shown. The  
48 numbers of EM images are shown.  
49 (C) Ni-NTA-nanogold labeling of *oda11*×LC1-C-His *Chlamydomonas* OAD.  
50 One of the stalk tips in the  $\beta\gamma$  two-headed structure was labeled with Ni-NTA-nanogold (orange arrowheads).

51  
52 **Figure S5. Data related to the single particle analysis of *Tetrahymena* DYH3 head fragment.**

53 (A) SDS-PAGE and Western blots of purified *Tetrahymena* DYH3 head fragment.  
54 The main band at the top of the gel represents the DYH3 head fragment. The minor bands are thought to correspond  
55 to degradation products due to chymotryptic digestion. The purified DYH3 head fragment was found to associate  
56 with endogenous LC1 by Western blots using *Tetrahymena* LC1 antibody (*Te* LC1 antibody).  
57 (B) Single particle analysis of *Tetrahymena* DYH3 head and stalk region.  
58 Class averages of *Tetrahymena* DYH3 head fragments showing the large stalk tip (top row). Similar EM images in  
59 the major group (indicated by orange asterisk) were sub-classified into five classes by K-means clustering (middle  
60 row). Subsequently, the images were aligned according to the stalk region by applying a mask shown (bottom row).  
61 The mask was applied to most of the AAA+ ring except the base of the stalk, so that information on the stalk angle  
62 was retained. Orange asterisks denote the class averages shown in Figure 3, and the numbers of images are indicated.  
63 (C) Single particle analysis of the stalk-tip region.  
64 Class averages of the stalk-tip region are shown in the upper two rows. In some classes, the large stalk tip image was  
65 composed of two sub-structures. One class average was sub-classified and the representative class average is shown  
66 in Figure 3B-iii (orange asterisk). The numbers of images are shown.

67  
68 **Figure S6. Supplemental results for Figure 4.**

69 (A) Relationship between molar concentration and band intensities.  
70 Known concentration of His- $\gamma$  stalk and GST-LC1 (1-4  $\mu$ M, 11.25  $\mu$ l each) were assessed by SDS-PAGE and the  
71 band intensities were measured using ImageJ (NIH). Mean value of the band intensity ratios (His- $\gamma$  stalk /GST-LC1)  
72 was 1.0, therefore, band intensity ratio (His- $\gamma$  stalk/GST-LC1) can be considered as molar ratio. Co-purified His- $\gamma$   
73 stalk and GST-LC1 in Figure 3C-(i) is within this range.  
74 (B) GST pull-down assay using  $\gamma$  MTBD region fragment.  
75 Schematic diagram of  $\gamma$  MTBD region fragment sequence and result of GST pull-down assay.  $\gamma$  MTBD fragment was  
76 detected in bound fraction together with GST-LC1. Here, GST pull-down assay was performed basically same as in  
77 Figure 5, except that concentration of  $\gamma$  MTBD fragment was 450 nM.

78  
79 **Figure S7. Comparison of the stalk sequences.**

80 (A) Schematic diagrams of the  $\gamma$  (yellow) and  $\beta$  (gray) stalk region sequences. The numbers of the amino acid residues  
81 used as junction sites for the chimeric stalk constructs are shown.



82 (B) Amino acid sequence of the stalk region of mouse cytoplasmic dynein HC, *Chlamydomonas*  $\alpha$ ,  $\beta$  and  $\gamma$  HCs,  
83 *Tetrahymena* DYH3 HC, human DNAH5 HC, human DNAH9 HC, and *Chlamydomonas* inner arm dynein-c. The  
84 regions corresponding to amino acids 3,047-3,350 of the *Chlamydomonas*  $\gamma$  HC were aligned (identical residues, red;  
85 similar residues, blue). The *Chlamydomonas*  $\gamma$  HC and its homologues are indicated in yellow, and *Chlamydomonas*  
86  $\beta$  HC is indicated in gray. The MTBD is defined as the region between two highly conserved proline residues  
87 (magenta asterisks). The numbers of amino acid residues in CC1 and CC2, counted from the proline residues, are  
88 shown above. Residues shown in magenta were used for the junction sites for the chimeric constructs. Known  
89 structural information of the MTBD, helix 1-6 (H1-H6), is highlighted, based on Carter *et al.* (2008) and Kato *et al.*  
90 (2014). The insert sequences between H2 and H3 are highlighted in magenta.

91

92 **Figure S8. SDS-PAGE images of the microtubule co-pelleting assay.**

93 SDS-PAGE results of the microtubule co-pelleting assay of  $\gamma$  stalk,  $\gamma$  stalk-LC1 complex, and LC1. Fixed  
94 concentration of microtubule (5  $\mu$ M) was incubated with increasing concentrations of  $\gamma$  stalk (0.97-5.8  $\mu$ M),  $\gamma$  stalk-  
95 LC1 complex (1.8-4.8  $\mu$ M), and LC1 (1.0-6.3  $\mu$ M). After centrifugation, the supernatant fraction and precipitation  
96 fraction were analyzed by SDS-PAGE. The images of gels were digitized and the intensities of the bands were  
97 quantified.

98

99 **Figure S9. Homology models of the MTBD region.**

100 Homology models were built from the NMR structure of dynein-c MTBD (PDB: 2RR7) for  $\alpha$  HC (A),  $\beta$  HC (B), and  
101  $\gamma$  HC (C). Only the  $\gamma$  MTBD was predicted to have the “flap” structure (red arrowheads). Note that the flap structure  
102 alone cannot explain the size of the additional structure in Figure 3B.

103

## 104 **Supplemental materials and methods**

### 105 **Strains and culture conditions**

106 *Chlamydomonas reinhardtii* strains used were WT (137C), *oda11* (Sakakibara et al., 1991), *oda4-s7* (Sakakibara et  
107 al., 1993), LC1-N-His, LC1-C-His, LC2-C-His (Furuta et al., 2009) and *oda11*×LC1-C-His. Cells were grown in  
108 liquid Tris-acetate-phosphate medium (Gorman and Levine, 1965) with aeration on a 12 h light and 12 h dark cycle,  
109 or on solid medium containing 1.5% agar.

110 *Tetrahymena thermophila* strains used were WT SB255, WT B2086, βHC-C-hGFP, and LC1-C-hsGFP. Cells were  
111 cultivated in SPP media (1% proteose peptone No.3, 0.2% glucose, 0.1% yeast extract, 0.003% Fe-EDTA) or in PYD  
112 media (1% proteose peptone No.3, 0.87% glucose, 0.5% yeast extract). Appropriate concentration of Cd<sup>2+</sup> and  
113 paromomycin for selection were added to the media if necessary.

114

### 115 **Antibodies**

116 To generate antibodies against *Chlamydomonas* LC1's 104-198 aa region, the cDNA sequence coding this region was  
117 amplified by PCR from wild type cDNA and subcloned into the pCold proS2 DNA vector (Takara) between *NdeI*  
118 and *BamHI* sites. In brief, the plasmid was transformed into *E. coli* BL21-CodonPlus (DE3) RIL (Stratagene) and  
119 induced protein was purified using the His-tag. After the His-tag and proS2-tag were removed by Thrombin digestion  
120 (Sigma), the relevant peptide fragment was separated by SDS-PAGE and used as the antigen to generate rabbit  
121 polyclonal antibody. For the production of antibody against *Tetrahymena* LC1, a peptide fragment corresponding to  
122 the 131-144 aa region (NWEELDKLKDLPEL) was synthesized as the antigen to generate rabbit polyclonal antibody.

123

### 124 **Purification of *Chlamydomonas* OAD complex**

125 Isolation and demembration of *Chlamydomonas* flagella were performed by standard methods (Witman et al.,  
126 1986). *Chlamydomonas* OAD complexes were extracted from the axonemes either by high salt extraction (0.6 M  
127 KCl, 30 mM HEPES pH 7.4, 1 mM EGTA, 5 mM MgSO<sub>4</sub>) or ATP extraction (5 mM ATP, 75 mM PIPES pH 6.8, 1  
128 mM MgCl<sub>2</sub>, 1 mM EGTA, 1 mM GTP, 1 mM DTT, 10 μg/ml leupeptin, 1 mM PMSF, 10 μM paclitaxel) (Goodenough  
129 and Heuser, 1984). The extracted OAD complex was further fractionated by 10-40% (w/v) sucrose density gradient  
130 centrifugation in 0.1 mM ATP, 75 mM PIPES pH 6.8, 1 mM MgCl<sub>2</sub>, 1 mM EGTA, 1 mM GTP, 1 mM DTT, 10 μg/ml  
131 leupeptin, 1 mM PMSF and 10 μM paclitaxel. For EM observation, the OAD complex purified by ATP extraction  
132 was used, since the three-headed structure was more readily observed in this condition.

133

### 134 **Purification of *Tetrahymena* OAD complex**

135 *Tetrahymena* cells were deciliated by the addition of 2 mM Ca<sup>2+</sup> (Rosenbaum and Carlson, 1969). Demembration  
136 of cilia was performed by adding 0.1% NP-40. *Tetrahymena* OAD complexes were isolated from the axoneme by  
137 high salt extraction (0.6 M NaCl, 10 mM HEPES-NaOH pH7.4, 4 mM MgSO<sub>4</sub>, 5 mM EGTA, 0.1 mM PMSF). The  
138 extracted recombinant OAD complex containing LC1-C-hsGFP was purified by SBP-tag using Strep-Tactin  
139 Sepharose resin (IBA), according to Ichikawa et al. (2011). Recombinant OAD complex containing βHC-C-hGFP  
140 was purified by His-tag using Profinity IMAC Ni-Charged Resin (Bio-Rad), and imidazole was removed from eluted  
141 protein with a NAP5 column (GE Healthcare). Purification of the wild-type OAD complex and chymotryptic



142 digestion to obtain the DYH3 head fragment was performed as in Yamaguchi et al. (2015).

143

#### 144 **Tagging of *Chlamydomonas* LC1**

145 To make *Chlamydomonas* LC1 expression constructs, a ~3.8 kb fragment containing the LC1 gene was amplified  
146 from wild-type *Chlamydomonas* genomic DNA using primers LC1-5p-F and LC1-3p-R. Primers used in this study  
147 are shown in Table S1. The PCR product was cloned into the *EcoRV* site of pBluescript II (Agilent Technologies) to  
148 create the construct pLC1. For N-terminal tagging with 8 × His, two oligo nucleotides, LC1-N-8×His-1 and LC1-N-  
149 8×His-2, were annealed and inserted into the *MscI* site of pLC1 to create the construct pLC1-N-His. For C-terminal  
150 tagging with 8 × His, two LC1 genomic fragments were amplified using primer sets LC1-F1/LC1-C-8×His-SpeI-R  
151 and LC1-3p-XbaI-F/LC1-3p-R. The two amplification products were digested with *SpeI* and *XbaI*, ligated together,  
152 and the product was digested with *NcoI* and *AatII* and used to replace the untagged LC1 gene in pLC1 to create  
153 pLC1-C-His. Each of the two His-tagged LC1 plasmids was linearized with *EcoRI* and co-transformed with pSI103  
154 (PMID: 11602359) into wild-type *Chlamydomonas* cells by electroporation. Cells expressing His-tagged LC1 were  
155 screened by Western blots. A cross between the LC1-C-His strain and strain *oda11* was produced using standard  
156 methods (Harris, 1989).

157

#### 158 **Tagging of *Tetrahymena* OAD subunits.**

159 pEGFP-neo4 vector (Kataoka et al., 2010) was modified so that an 8 × His-tag was introduced in a loop region of  
160 EGFP as in Kobayashi et al. (2008) by inverse PCR using primer set phGFP-inverse-F and phGFP-inverse-R (phGFP-  
161 neo4 vector). The phGFP-neo4 vector was further modified so as to carry an SBP-tag by inverse PCR using primer  
162 sets phsGFP-inverse-1st-F/phsGFP-inverse-1st-R and phsGFP-inverse-2nd-F/phsGFP-inverse-2nd-R (phsGFP-neo4  
163 vector). Homologous recombination into the *Tetrahymena* macronucleus was performed as in Kataoka et al. (2010).  
164 In brief, an hsGFP-neo4-fragment was amplified from phsGFP-neo4 vector with primers GFP-neo4-F and GFP-neo4-  
165 R. The DNA sequences encoding the C-terminal region of LC1 (LC1-C-fragment; 1,263 bp) and the 3' flanking  
166 region (LC1-3'-fragment; 1,475 bp) were amplified from *Tetrahymena* genomic DNA with primer sets LC1-C-F/LC1-  
167 C-R and LC1-3'-F/LC1-3'-R. These three fragments were integrated by overlapping PCR using primers overlap-  
168 outer-F and overlap-outer-R. Transformation was performed using a PDS-1000/He biolistic delivery system (BioRad).  
169 To select transformants, a drug resistance gene was induced with 1 μg/ml Cd<sup>2+</sup>, and 100 μg/ml paromomycin was  
170 added for selection. hGFP-tagging to *Tetrahymena* βHC was performed similarly. Since the *Tetrahymena*  
171 macronucleus holds ~45 copies of genes, a phenotypic assortment process was performed to obtain transformants  
172 with a high copy number of the recombinant gene (Wood et al., 2007). The concentration of Cd<sup>2+</sup> was reduced  
173 gradually to 0.01 μg/ml, and then the paromomycin concentration was increased gradually to 850 μg/ml for the LC1-  
174 C-hsGFP strain and 600 μg/ml for the βHC-C-hGFP strain. The increase of the ratio of recombinant genes was  
175 assessed by GFP fluorescence and PCR analysis (Supplemental Figure S1B). For the βHC-C-hGFP strain, a single  
176 cell line whose β HC genes were completely replaced with recombinant genes was obtained and used for the study  
177 (strain-3 in Supplemental Figure S1B). GFP fluorescence images were acquired using a CCD camera (iXonEM  
178 DV860, Andor) attached to an IX70 microscope (Olympus) equipped with a confocal scanner unit (CSU10,  
179 Yokogawa).

180

181 **Measurements of swimming velocity and beat frequency.**

182 Swimming of *Chlamydomonas* was recorded using BX53 microscope (Olympus) equipped with a CCD  
183 camera (ADT-33S, FLOVEL). Swimming velocities of *Chlamydomonas* cells were analyzed using  
184 ImageJ MTrack2 plug-in (<http://valelab.ucsf.edu/~nstuurman/ijplugins/MTrack2.html>). Beat  
185 frequencies of *Chlamydomonas* cells were measured by fast Fourier transform (FFT) analysis of  
186 vibrations of the cells (Kamiya, 2000).

187

188 **Construction of proteins for biochemical experiments.**

189 The cDNA regions encoding the stalk regions of  $\alpha$ ,  $\beta$  and  $\gamma$  HC were amplified from *Chlamydomonas* cDNA with  
190 appropriate primer pairs (Supplemental Table S1) so that the numbers of amino acid residues in CC1 and CC2 would  
191 be 85 and 82 respectively. The fragments were subcloned into pColdI vector between *XhoI* and *HindIII* sites, and  
192 pColdI- $\alpha$  stalk, pColdI- $\beta$  stalk and pColdI- $\gamma$  stalk were obtained. pColdI- $\gamma$  MTBD was constructed similarly. The  
193 cDNA region coding *Chlamydomonas* LC1 was amplified and inserted into vector pGEX-6P-2 between *BamHI* and  
194 *EcoRI* sites to produce pGEX-6P-2-LC1. To create chimeric stalk constructs with a  $\beta$  HC base and a  $\gamma$  HC tip ( $\beta$ 35:35-  
195  $\gamma$ 50:47,  $\beta$ 63:63- $\gamma$ 22:19,  $\beta$ 85:82- $\gamma$ MTBD), pColdI- $\beta$  stalk vector was linearized by inverse PCR and fragments  
196 encoding the  $\gamma$  stalk-tip region or the  $\gamma$  MTBD region were amplified from pColdI- $\gamma$  stalk by PCR. These fragments  
197 were integrated by blunt-end ligation and pColdI- $\beta$ 35:35- $\gamma$ 50:47, pColdI- $\beta$ 63:63- $\gamma$ 22:19 and pColdI- $\beta$ 85:82- $\gamma$ MTBD  
198 vectors were obtained. pColdI- $\beta$ 35:35- $\gamma$ 50:47, pColdI- $\beta$ 63:63- $\gamma$ 22:19 and pColdI- $\beta$ 85:82- $\gamma$ MTBD vectors were  
199 created vice versa. All PCR products were verified by sequencing.

200

201 **Purification of proteins for biochemical experiments.**

202 The resultant plasmids were transformed into *E. coli* BL21-CodonPlus (DE3) RIL. Cells were cultured in 500 ml LB  
203 medium supplemented with 50  $\mu$ g/ml ampicillin at 37°C until the optical density OD<sub>600</sub> reached 0.4-0.5. For  
204 constructs in pColdI, cells were cultured for a further 24 h after the temperature was lowered to 15°C and 0.1 mM  
205 isopropyl-1-thio- $\beta$ -D-galactopyranoside (IPTG) was added to the media for induction. Cells containing pGEX-6P-2-  
206 LC1 were cultured for a further 3 h at 20°C after 0.4 mM IPTG was added. For the stalk constructs and  $\gamma$  MTBD  
207 fragment, purification was performed using the His-tag derived from the pColdI vector. The cells were lysed with  
208 His-tag lysis buffer (50 mM Tris-HCl pH 8.0, 150 mM NaCl, 20 mM imidazole), sonicated, and ultracentrifuged.  
209 The supernatant obtained was left to bind to Profinity IMAC Ni-Charged Resin (BIO-RAD) for 30 min, 4°C. The  
210 resin was washed three times with His-tag wash buffer (50 mM Tris-HCl pH 8.0, 250 mM NaCl, 20 mM imidazole)  
211 and bound protein was eluted with His-tag elution buffer (50 mM Tris-HCl pH 8.0, 150 mM NaCl, 300 mM  
212 imidazole). LC1 construct was purified using the GST-tag from vector pGEX-6P-2. For the purification of GST-  
213 tagged LC1 (GST-LC1), the cell pellet was resuspended, sonicated, and ultracentrifuged in PBS (10 mM Na<sub>2</sub>HPO<sub>4</sub>,  
214 1.8 mM KH<sub>2</sub>PO<sub>4</sub>, 140 mM NaCl, 2.7 mM KCl, pH 7.3) containing 1 mM DTT. GST•Bind Resin was added to the  
215 supernatant and incubated for 60 min at 4°C. The resin was washed three times with PBS containing 1 mM DTT. To  
216 obtain GST-tagged LC1 (GST-LC1), protein was eluted with GST elution buffer (50 mM Tris-HCl pH8.0, 100 mM  
217 NaCl, 10 mM glutathione). To purify LC1 without a GST-tag, PreScission base buffer (50 mM Tris-HCl pH 7.5, 150



218 mM NaCl, 1 mM EDTA) was used instead of PBS, and the GST-tag was removed by incubating with PreScission  
219 base buffer containing 1 mM DTT and PreScission protease (GE Healthcare) overnight at 4°C. To perform tandem  
220 affinity purification of His- $\gamma$ stalk and GST-LC1, the supernatants of *E.coli* expressing either His- $\gamma$  stalk or GST-LC1  
221 were mixed for 1 h at 4°C prior to sequential purification using the His-tag and the GST-tag. For all the purified  
222 proteins, buffer was exchanged to NAP5 buffer by using NAP5 columns (GE Healthcare). Protein concentrations  
223 were determined according to Read and Northcote (1981) using BSA as the standard.

224

### 225 **Computational analysis**

226 To quantify band intensities, ImageJ (NIH) or Quantity One software (BioRad) were used. Data analysis was  
227 performed using Excel, Sigmaplot and GraphPad Prism 6. Statistical analyses were performed using GraphPad Prism  
228 6. Alignment of sequences was performed by Clustal W (Thompson et al., 1994). For homology modeling of the  
229 MTBD structure, Swiss Model Server (Arnold et al., 2006) was used.

230

231

232

233

### 234 **References**

235 Arnold, K., Bordoli, L., Kopp, J., & Schwede, T. (2006). The SWISS-MODEL workspace: a web-based environment  
236 for protein structure homology modelling. *Bioinformatics*, 22(2), 195-201.

237

238 Gorman, D. S., & Levine, R. P. (1965). Cytochrome f and plastocyanin: their sequence in the photosynthetic electron  
239 transport chain of *Chlamydomonas reinhardi*. *Proceedings of the National Academy of Sciences of the United States*  
240 *of America*, 54(6), 1665.

241

242 Harris, E. H. (1989). The chlamydomonas sourcebook (Vol. 2). San Diego: Academic Press.

243

244 Ichikawa, M., Watanabe, Y., Murayama, T., & Toyoshima, Y. Y. (2011). Recombinant human cytoplasmic dynein  
245 heavy chain 1 and 2: observation of dynein-2 motor activity in vitro. *FEBS letters*, 585(15), 2419-2423.

246

247 Kamiya, R. (2000). Analysis of cell vibration for assessing axonemal motility in *Chlamydomonas*.  
248 *Methods*. 22:383–387. <http://dx.doi.org/10.1006/meth.2000.1090>

249

250 Kataoka, K., Schoeberl, U. E., & Mochizuki, K. (2010). Modules for C-terminal epitope tagging of *Tetrahymena*  
251 genes. *Journal of Microbiological Methods*, 82(3), 342-346.

252

253 Read, S. M., & Northcote, D. H. (1981). Minimization of variation in the response to different proteins of the  
254 Coomassie blue G dye-binding assay for protein. *Analytical biochemistry*, 116(1), 53-64.

255

256 Rosenbaum, J. L., & Carlson, K. (1969). Cilia regeneration in Tetrahymena and its inhibition by colchicine. *The*  
257 *Journal of Cell Biology*, 40(2), 415-425.

258

259 Sakakibara, H., Mitchell, D. R., & Kamiya, R. (1991). A Chlamydomonas outer arm dynein mutant missing the alpha  
260 heavy chain. *The Journal of Cell Biology*, 113(3), 615-622.

261

262 Sakakibara, H., Takada, S., King, S. M., Witman, G. B., & Kamiya, R. (1993). A Chlamydomonas outer arm dynein  
263 mutant with a truncated beta heavy chain. *Journal of Cell Biology*, 122(3), 653-661.

264

265 Thompson, J. D., Higgins, D. G., & Gibson, T. J. (1994). CLUSTAL W: improving the sensitivity of progressive  
266 multiple sequence alignment through sequence weighting, position-specific gap penalties and weight matrix choice.  
267 *Nucleic Acids Research*, 22(22), 4673-4680.

268

269 Witman, G. B. (1986). Isolation of Chlamydomonas flagella and flagellar axonemes. *Methods in enzymology*, 134,  
270 280-290.

271

272 Wood, C. R., Hard, R., & Hennessey, T. M. (2007). Targeted gene disruption of dynein heavy chain 7 of Tetrahymena  
273 thermophila results in altered ciliary waveform and reduced swim speed. *Journal of Cell Science*, 120(17), 3075-  
274 3085.

275
